# Supplementary material for: Deverra triradiata Hochst. ex Boiss. from the Northern Region of Saudi Arabia: Essential Oil Profiling, Plant Extracts and Biological Activities
Source: MDPI journal article supplement (doi:10.3390/plants11121543), 2022-06-09
Supplement: s1 [file s1]

Table S1 Allelopathic effects of the plant extracts of *D. triradiata* samples at different concentrations on *Triticum aestivum* L.

| (a) Inhibitory effect compared to control (%) |                     |                    |                     |                     |                    |                    |                     |                     |                     |                     |                      |                      |                     |                      |                     |                      |
|-----------------------------------------------|---------------------|--------------------|---------------------|---------------------|--------------------|--------------------|---------------------|---------------------|---------------------|---------------------|----------------------|----------------------|---------------------|----------------------|---------------------|----------------------|
| Plant extract concentration (mg/ml)           |                     | 0.2                |                     |                     | 0.4                |                    |                     | 0.6                 |                     |                     | 0.8                  |                      |                     | 1                    |                     |                      |
|                                               |                     | Pet.Et             | Et.Ac               | Met                 | P.Et               | Et.Ac              | Met                 | P.Et                | Et.Ac               | Met                 | P.Et                 | Et.Ac                | Met                 | P.Et                 | Et.Ac               | Met                  |
| Aerial parts<br>extracts                      | Seed germination    | -1 <sup>g</sup>    | -17.26 <sup>n</sup> | -15.14 <sup>m</sup> | 9.11 <sup>b</sup>  | -2.86 <sup>i</sup> | -8.23 <sup>k</sup>  | 0.49 <sup>f</sup>   | 6.08 <sup>c,d</sup> | 11.38 <sup>a</sup>  | 3.84 <sup>e</sup>    | 5.56 <sup>d</sup>    | -3.76 <sup>j</sup>  | -10.55 <sup>l</sup>  | 6.65 <sup>c</sup>   | -2.08 <sup>h</sup>   |
|                                               | Radicle length      | 1.19 <sup>d</sup>  | -2.52 <sup>g</sup>  | -8.64 <sup>h</sup>  | 22.48 <sup>a</sup> | 7.57 <sup>c</sup>  | 7.97 <sup>c</sup>   | -51.46 <sup>l</sup> | 22.73 <sup>a</sup>  | 16.22 <sup>b</sup>  | -0.53 <sup>f</sup>   | 5.71 <sup>d</sup>    | -16.22 <sup>i</sup> | -73.40 <sup>m</sup>  | -25.13 <sup>k</sup> | -20.74 <sup>j</sup>  |
|                                               | Hypocotyl length    | 17.94 <sup>k</sup> | 42.09 <sup>d</sup>  | 34.40 <sup>g</sup>  | 21.58 <sup>j</sup> | 40.81 <sup>e</sup> | 47.86 <sup>a</sup>  | 3.63 <sup>l</sup>   | 38.88               | 44.23 <sup>c</sup>  | 31.19 <sup>h</sup>   | 39.74 <sup>e,f</sup> | 30.34 <sup>h</sup>  | -38.24 <sup>m</sup>  | 23.29 <sup>i</sup>  | 45.72 <sup>b</sup>   |
|                                               | Seedling dry weight | 42.14 <sup>a</sup> | 4.95 <sup>h</sup>   | -25.61 <sup>l</sup> | 7.43 <sup>f</sup>  | 0 <sup>j</sup>     | 5.78 <sup>g,h</sup> | 1.65 <sup>i</sup>   | 9.91 <sup>e</sup>   | 6.61 <sup>f,g</sup> | 11.57 <sup>d</sup>   | 33.05 <sup>b</sup>   | 7.43 <sup>f</sup>   | -16.52 <sup>k</sup>  | 23.14 <sup>c</sup>  | 0 <sup>j</sup>       |
| (b) Inhibitory effect compared to control (%) |                     |                    |                     |                     |                    |                    |                     |                     |                     |                     |                      |                      |                     |                      |                     |                      |
| Plant extract concentration (mg/ml)           |                     | 0.2                |                     |                     | 0.4                |                    |                     | 0.6                 |                     |                     | 0.8                  |                      |                     | 1                    |                     |                      |
|                                               |                     | Pet.Et             | Et.Ac               | Met                 | P.Et               | Et.Ac              | Met                 | P.Et                | Et.Ac               | Met                 | P.Et                 | Et.Ac                | Met                 | P.Et                 | Et.Ac               | Met                  |
| Roots<br>extracts                             | Seed germination    | 10.54 <sup>c</sup> | 4.38 <sup>e</sup>   | 5.56 <sup>d</sup>   | -3.26 <sup>i</sup> | 1.36 <sup>g</sup>  | 10.54 <sup>c</sup>  | -1.80 <sup>h</sup>  | 12.32 <sup>a</sup>  | 11.04 <sup>c</sup>  | 3.21 <sup>f</sup>    | -7.18 <sup>j</sup>   | 3.61 <sup>e,f</sup> | 12.02 <sup>a,b</sup> | -3.26 <sup>i</sup>  | 11.38 <sup>b,c</sup> |
|                                               | Radicle length      | -1.72 <sup>h</sup> | 12.5 <sup>e</sup>   | 16.88 <sup>d</sup>  | -3.45 <sup>i</sup> | -8.37 <sup>j</sup> | 9.44 <sup>f</sup>   | 1.72 <sup>g</sup>   | 22.2 <sup>c</sup>   | 34.97 <sup>a</sup>  | -2.26 <sup>h</sup>   | -9.57 <sup>k</sup>   | 24.06 <sup>b</sup>  | 15.95 <sup>d</sup>   | -4.25 <sup>i</sup>  | 23.67 <sup>b</sup>   |
|                                               | Hypocotyl length    | 9.61 <sup>l</sup>  | 33.97 <sup>f</sup>  | 43.58 <sup>c</sup>  | 36.75 <sup>e</sup> | 22.22 <sup>j</sup> | 30.34 <sup>g</sup>  | 39.31 <sup>d</sup>  | 26.28 <sup>h</sup>  | 43.58 <sup>c</sup>  | 25.21 <sup>h,i</sup> | 19.44 <sup>k</sup>   | 46.79 <sup>b</sup>  | 24.78 <sup>i</sup>   | 20.72 <sup>k</sup>  | 57.59 <sup>a</sup>   |
|                                               | Seedling dry weight | 28.92 <sup>e</sup> | 20.66 <sup>g</sup>  | 33.05 <sup>d</sup>  | 14.87 <sup>j</sup> | 52.06 <sup>b</sup> | 16.52 <sup>i</sup>  | 8.26 <sup>m</sup>   | 18.18 <sup>h</sup>  | 44.62 <sup>c</sup>  | 1.65 <sup>n</sup>    | 11.57 <sup>l</sup>   | 21.48 <sup>g</sup>  | 66.11 <sup>a</sup>   | 24.79 <sup>f</sup>  | 13.22 <sup>k</sup>   |

seedlings.a) Aerial parts Extracts; b) Roots extracts; Pet Et: Petroleum Ether, Et Ac: Ethyl Acetate and Met: Methanol. Inhibitory effect (%) is calculated as follows:  $\text{PytPot } D. \text{ triradiata } (\%) = [(PEE - Ce) / CE] \times 100$ ; Where PEE: the effect of plant extract and CE : the null effect of the negative control. Values in line not sharing common letters are significantly different ( $p < 0.05$ ).
